# Supplementary material
Source: PubMed Central journal article supplement (PMC6735425)
Supplement: jamaoncol-5-e192553-s001.pdf [file jamaoncol-5-e192553-s001.pdf]

## Supplementary Online Content

Arrieta O, Barrón F, Salinas Padilla M-A, et al. Effect of metformin plus tyrosine kinase inhibitors compared with tyrosine kinase inhibitors alone in patients with epidermal growth factor receptor–mutated lung adenocarcinoma: a phase 2 randomized clinical trial. *JAMA Oncol*. Published online September 5, 2019. doi:10.1001/jamaoncol.2019.2553

**eFigure 1.** Molecular effects of metformin on lung cancer

**eFigure 2.** Progression-free survival (radio-oncologist 2)

**eFigure 3.** (A) Kaplan-Meier curves for overall survival among patients who received second-line treatment and (B) patients who did not receive a second-line of treatment

**eFigure 4.** Kaplan-Meier curves for (A) Progression-free survival comparison between patients with negative LKB1 expression according to the therapeutic arm. (B) Overall survival comparison between patients with negative LKB1 expression according to the received treatment. (C) Progression-free survival comparison between patients with positive LKB1 expression according to the received treatment. (D) Overall survival comparison between patients with positive LKB1 expression according to therapeutic arm

**eFigure 5.** Box-plots of the serum levels of Glucose (A), HbA1c (B), Interleukin-6 (C), and Insulin growth factor receptor (D) at baseline, the endo of 1st, and 2nd EGFR-TKIs cycle

**eMethods 1.** Supplementary laboratory methods

**eMethods 2.** Supplementary log file for statistical analysis

**eTable 1.** Concordance agreement assessment among radio-oncologists (n=2) for the radiographic evaluation of the best response rate through RECIST v1.1

**eTable 2.** Univariate and multivariate analysis of the clinic-pathological factors associated with progression-free survival according to radio-oncologist 2

**eTable 3.** Crude and adjusted Hazard Ratios for PFS by Radio-oncologists 1 and 2

**eTable 4.** Adverse events

**eTable 5.** Details of metformin treatment

**eTable 6.** Further lines of treatment

**eTable 7.** Overall survival among patients who did not receive a second-line of therapy after intervention

**eTable 8.** Overall survival among patients who received a second-line of therapy after intervention

**eTable 9.** Univariate and LKB1-stratified analysis of the clinic-pathological factors associated with progression-free survival

**eTable 10.** Univariate and LKB1-stratified analysis of the clinic-pathological factors associated with overall survival

This supplementary material has been provided by the authors to give readers additional information about their work.

eFigure 1. Possible mechanisms of action for metformin's antitumor activity

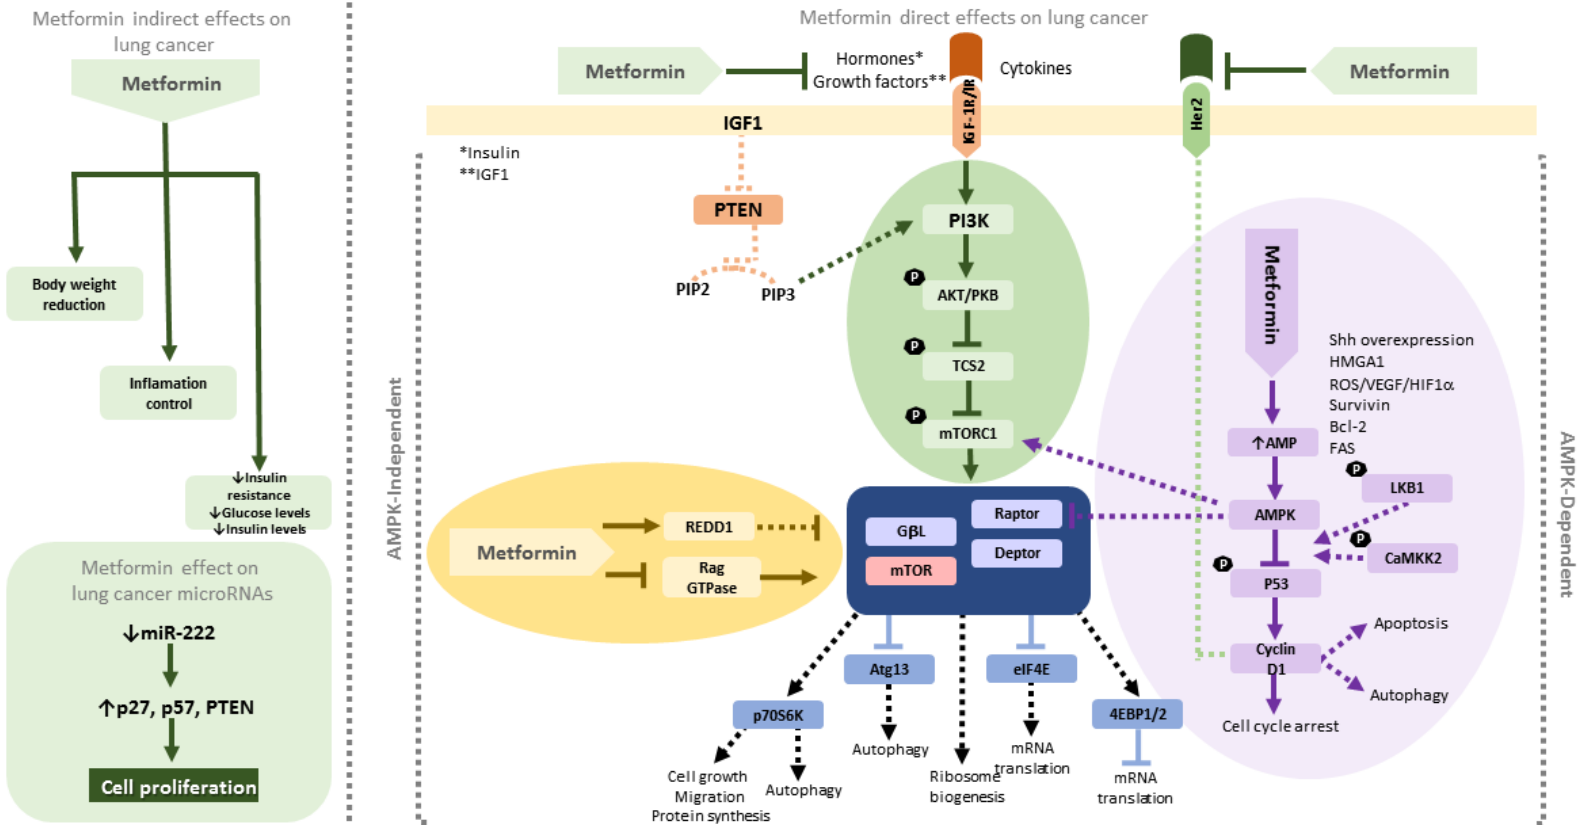

**eFigure 2. Progression-free survival (radio-oncologist 2)**

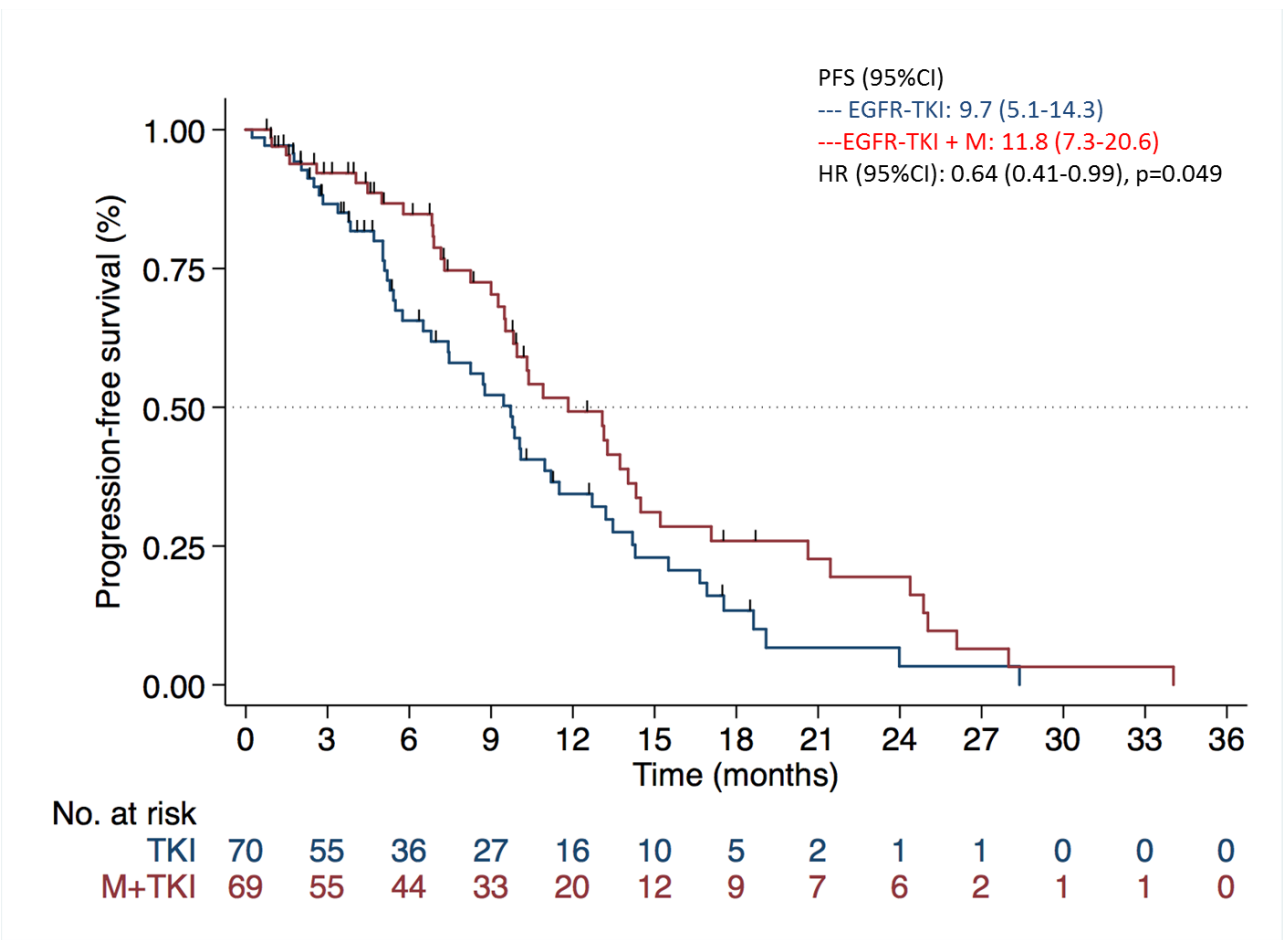

**eFigure 3. (A) Kaplan-Meier curves for overall survival among patients who received second-line treatment and (B) patients who did not receive a second-line of treatment.**

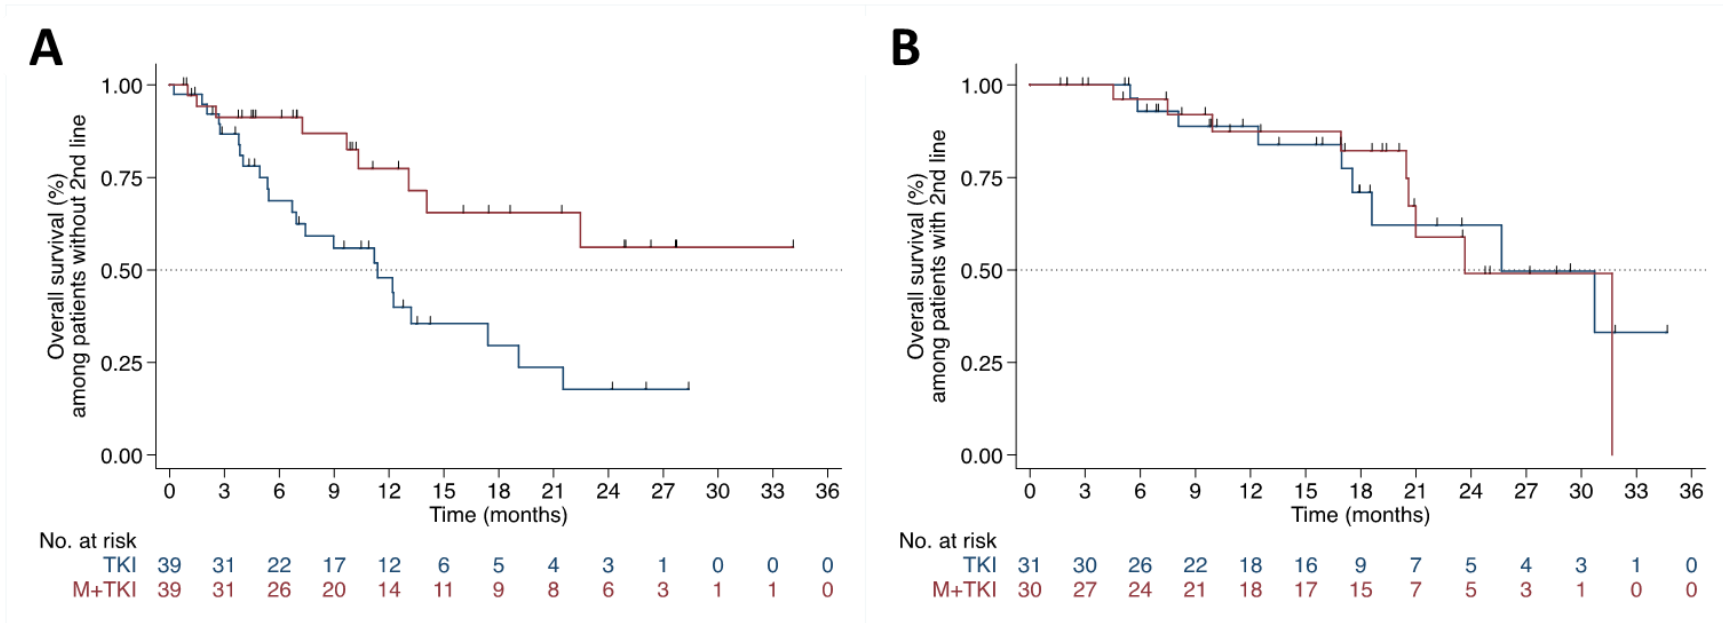

**eFigure 4. Kaplan-Meier curves for (A) Progression-free survival comparison between patients with negative LKB1 expression according to the therapeutic arm. (B) Overall survival comparison between patients with negative LKB1 expression according to the received treatment. (C) Progression-free survival comparison between patients with positive LKB1 expression according to the received treatment. (D) Overall survival comparison between patients with positive LKB1 expression according to therapeutic arm.**

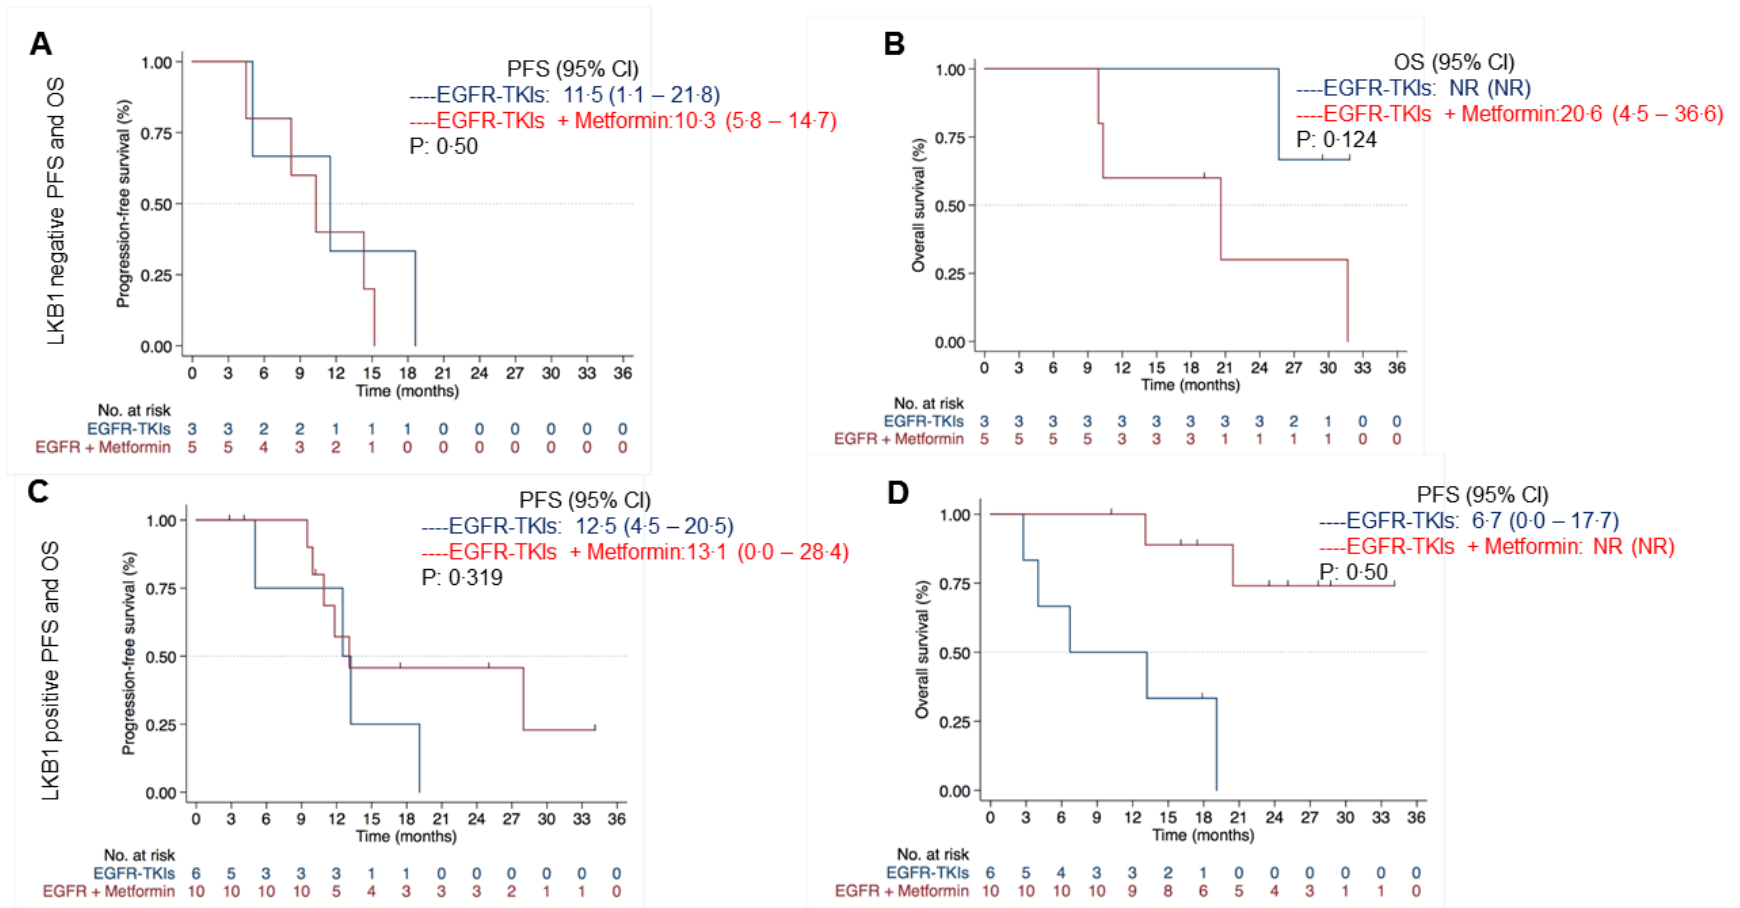

**eFigure 5. Box-plots of the serum levels of Glucose (A), HbA1c (B), Interleukin-6 (C), and Insulin growth factor receptor (D) at baseline, the endo of 1st, and 2nd EGFR-TKIs cycle.**

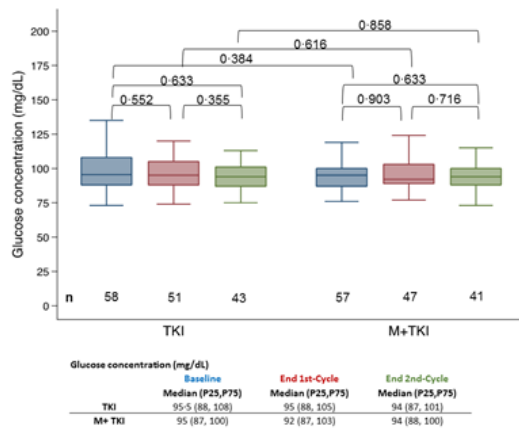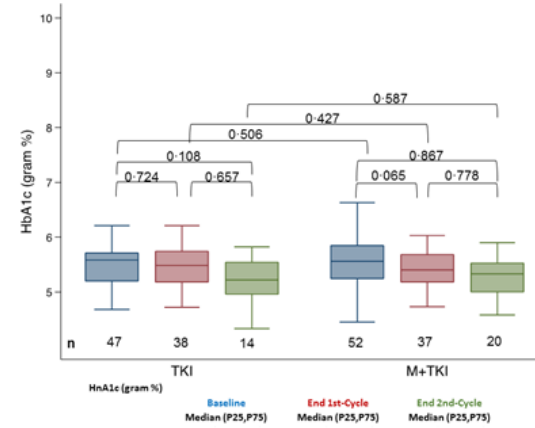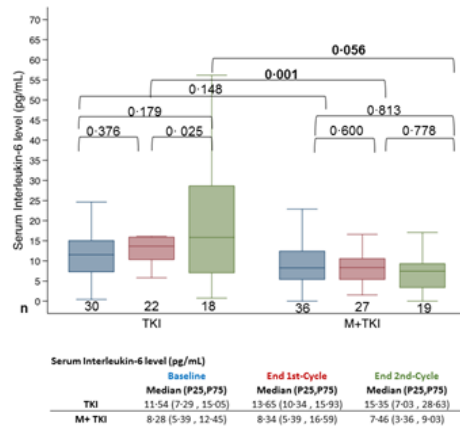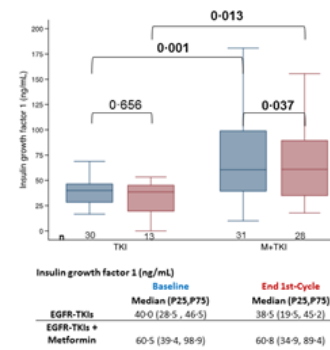

## eMethods 1

Genomic DNA extractions were performed from tissue biopsies with >50% tumorous cells using a QIAamp DNA FFPE Tissue Kit (QIAGEN) according to the instructions of the manufacturer. Mutations within the *EGFR* gene exons 18, 19, 20, and 21 were detected by screening using the RGQ PCR Kit (QIAGEN, Scorpions ARMS method).

In order to perform Immunohistochemistry testing for LKB1, biopsies and surgical resection specimens fixed in formalin and embedded in paraffin were analyzed. Tissue sections (5 µm) were deparaffinized in xylene, and hydrated in a graded ethanol series, endogenous peroxidase activity was quenched with hydrogen peroxidase for 10 minutes, followed by heat-induced epitope retrieval with immunoDNA Retriever 20X with citrate (Bio SB, Inc.CA, USA). Samples were washed with 1X Tris-buffered saline (TBS Automation Wash Buffer,40X), and the tissue sections were incubated with Anti-STK11 (1:50, HPA017254, SIGMA) at room temperature for 45 minutes. The reaction was visualized using MACH 4 universal HRP-polymer kit (BIOCARE. CA, USA) incubated with DAB for 3 minutes. Sections were then counterstained with hematoxylin and ammonium hydroxide. Isotype-matched IgG was used as a control for staining. A blinded and independent pathologist (AAS) examined all tissue samples. The intensity of LKB1 staining and the percentage of stained cells were assessed and recorded. A sample was considered positive for LKB1 when any intensity staining was registered.

Serum samples were collected before the start of treatment with EGFR-TKIs, after the end of the 1<sup>st</sup> and 2<sup>nd</sup> cycle of treatment. Il-6 and IGF serum levels were determined using using ELISA, which was performed according to Quantikine Il-6 and IGF ELISA Kit (R&D System, Minneapolis, MN, USA). All assays were performed in duplicate. Color intensity was measured at 450 nm with a spectrophotometric plate reader. Il-6 and IGF concentrations were determined by comparison with standard curves.



## eMethods 2

### Statistical analyses

---

---

name: <unnamed>

log: /Users/alejandra/Desktop/jama.log

log type: text

opened on: 6 May 2019, 12:21:57.

use "/Users/alejandra/Desktop/database\_NCT03071705.dta".

.

\*TITLE:Metformin plus TKI, a phase II RCT (NCT03071705).\*

STATISTICAL ANALYSIS DOCUMENTATION.

\*use "/Users/alejandra/Desktop/database\_NCT03071705.dta".

\*gen consecutive\_ID = \_n.

\*sum id.

\*set more off.

\*describe.

\*tab gender.

\*hist age, normal.

\*swilk age.

\*sum age, det.

\*tab age\_groups.

\*tab smk.

\*tab wse.

\*tab adeno\_subtype.

\*tab bone\_mets.

\*tab pleural\_mets.

\*tab cl\_mets.

\*tab adrenal\_mets.

\*tab brain\_mets.

\*tab liver\_mets.  
\*tab mut.  
\*tab intervention.  
\*tab EGFR\_TKI.  
\*tab best\_gps.  
\*tab orr.  
\*tab dcr.  
\*tab recist\_masao.  
\*tab orr\_masao.  
\*tab dcr\_masao.  
\*tab segunda\_linea.  
\*tab tipo\_segunda\_linea.  
\*tab tercera\_linea.  
.  
\*tab gender intervention, col chi.  
\*bysort intervention: sum age, det.  
\*tab age\_groups intervention, col chi.  
\*tab smk intervention, col chi.  
\*tab wse intervention, col chi.  
\*tab adeno\_subtype intervention, col chi.  
\*tab bone\_mets intervention, col chi.  
\*tab pleural\_mets intervention, col chi.  
\*tab cl\_mets intervention, col chi.  
\*tab adrenal\_mets intervention, col chi.  
\*tab brain\_mets intervention, col chi.  
\*tab liver\_mets intervention, col chi.  
\*tab mut intervention, col chi.  
\*tab intervention intervention, col chi.  
\*tab EGFR\_TKI intervention, col chi.  
\*tab intervention intervention, col chi.

```

*tab best_gps intervention, col chi.

*tab orr intervention, col chi.

*tab dcr intervention, col chi.

*tab recist_masao.

*tab orr_masao.

*tab dcr_masao.

*tab segunda_linea intervention, col chi.

*tab tipo_segunda_linea intervention, col chi.

*tab tercera_linea intervention, col chi.

.

*preserve.

*parmby "prop orr, over (intervention)", norestore.

*restore.

*preserve.

*parmby "prop dcr, over (intervention)", norestore.

*restore.

*preserve.

*parmby "prop orr_masao, over (intervention)", norestore.

*restore.

*preserve.

*parmby "prop dcr_masao, over (intervention)", norestore.

*restore.

.

*kappa best_gps recist_masao, tab.

*kappa orr orr_masao, tab.

*kappa dcr dcr_masao, tab.

.

*twoway (bar BEST_tumor_response_percentage id2 if intervention==0, sort)//>/,>

*(bar BEST_tumor_response_percentage id2 if intervention==1).

*twoway (bar A id2 if intervention==0, sort) ///, >

```

```

*(bar A id2 if intervention==1).
.
*0 Overall.
*preserve.
*set more off.
*stset slp_139, failure (progres1=1).
*stsum.
*stci.
*sts graph, risktable censored(single).
*restore.
* 1 Sex.
*preserve.
*set more off.
*stset slp_139, failure (progres1=1).
*stsum, by(gender).
*stci, by(gender).
*stcox i.gender.
*sts test gender.
*sts graph, by(gender) risktable censored(single).
*restore.
* 2 Age.
*preserve.
*set more off.
*stset slp_139, failure (progres1=1).
*stsum, by(age_groups).
*stci, by(age_groups).
*stcox c.age.
*streg age, dist(exponential) tr.
*sts test age.
*sts graph, by(age_groups) risktable censored(single).

```

\*restore.  
\* 3 Smoking status.  
\*preserve.  
\*set more off.  
\*stset slp\_139, failure (progres1=1).  
\*stsum, by(sm).  
\*stci, by(sm).  
\*stcox i.sm.  
\*sts test sm.  
\*sts graph, by(sm) risktable censored(single).  
\*restore.  
\* 4 Wood---smoke exposure.  
\*preserve.  
\*set more off.  
\*stset slp\_139, failure (progres1=1).  
\*stsum, by(wse).  
\*stci, by(wse).  
\*stcox i.wse.  
\*sts test wse.  
\*sts graph, by(wse) risktable censored(single).  
\*restore.  
\* 5 Adenocarcinoma Subtype.  
\*preserve.  
\*set more off.  
\*stset slp\_139, failure (progres1=1).  
\*stsum, by(adenogp).  
\*stci, by(adenogp).  
\*stcox i.adenogp.  
\*sts test adeno\_gp.  
\*sts graph, by(adenogp) risktable censored(single).

```
*restore.  
  
* 6 Bone metastases.  
  
*preserve.  
  
*set more off.  
  
*stset slp_139, failure (progres1=1).  
  
*stsum, by(bone_mets).  
  
*stci, by(bone_mets).  
  
*stcox i.bone_mets.  
  
*sts test bone_mets.  
  
*sts graph, by(bone_mets) risktable censored(single).  
  
*restore.  
  
* 7 Pleural metastases.  
  
*preserve.  
  
*set more off.  
  
*stset slp_139, failure (progres1=1).  
  
*stsum, by(pleural_mets).  
  
*stci, by(pleural_mets).  
  
*stcox i.pleural_mets.  
  
*sts test pleural_mets.  
  
*sts graph, by(pleural_mets) risktable censored(single).  
  
*restore.  
  
* 8 Contralateral metastases.  
  
*preserve.  
  
*set more off.  
  
*stset slp_139, failure (progres1=1).  
  
*stsum, by(cl_mets).  
  
*stci, by(cl_mets).  
  
*stcox i.cl_mets.  
  
*sts test cl_mets.  
  
*sts graph, by(cl_mets) risktable censored(single).
```

```
*restore.  
  
* 9 Adrenal metastases.  
  
*preserve.  
  
*set more off.  
  
*stset slp_139, failure (progres1=1).  
  
*stsum, by(adrenal_mets).  
  
*stci, by(adrenal_mets).  
  
*stcox i.adrenal_mets.  
  
*sts test adrenal_mets.  
  
*sts graph, by(adrenal_mets) risktable censored(single).  
  
*restore.  
  
* 10 Brain metastases.  
  
*preserve.  
  
*set more off.  
  
*stset slp_139, failure (progres1=1).  
  
*stsum, by(brain_mets).  
  
*stci, by(brain_mets).  
  
*stcox i.brain_mets.  
  
*sts test brain_mets.  
  
*sts graph, by(brain_mets) risktable censored(single).  
  
*restore.  
  
* 11 Liver metastases.  
  
*preserve.  
  
*set more off.  
  
*stset slp_139, failure (progres1=1).  
  
*stsum, by(liver_mets).  
  
*stci, by(liver_mets).  
  
*stcox i.liver_mets.  
  
*sts test liver_mets.  
  
*sts graph, by(liver_mets) risktable censored(single).
```

\*restore.

\* 12 Mutation status.

\*preserve.

\*set more off.

\*stset slp\_139, failure (progres1=1).

\*stsum, by(mut) . \*stci, by(mut).

\*stcox i.mut.

\*sts test mut.

\*sts graph, by(mut) risktable censored(single).

\*restore.

\* 13 EGFR TKIs.

\*preserve.

\*set more off.

\*stset slp\_139, failure (progres1=1).

\*stsum, by(EGFR\_TKI).

\*stci, by(EGFR\_TKI).

\*stcox ib3.EGFR\_TKI.

\*sts test EGFR\_TKI.

\*sts graph, by(EGFR\_TKI) risktable censored(single).

\*restore.

\* 14 Objective Response Rate (ORR).

\*preserve.

\*set more off.

\*stset slp\_139, failure (progres1=1).

\*stsum, by(orr).

\*stci, by(orr).

\*stcox i.orr.

\*sts test orr.

\*sts graph, by(orr) risktable censored(single).

\*restore.



```
* 15 Disease control rate (DCR).
*preserve.
*set more off.
*stset slp_139, failure (progres1=1).
*stsum, by(dcr).
*stci, by(dcr).
*stcox i.dcr.
*sts test dcr.
*sts graph, by(dcr) risktable censored(single).
*restore.
* 16 Intervention (Therapeutic arm).
*preserve.
*set more off.
*stset slp_139, failure (progres1=1).
*stsum, by(intervention).
*stci, by(intervention).
*stcox i.intervention.
*sts test intervention.
*sts graph, by(intervention) risktable censored(single).
*restore.
* 17 LKB---1.
*preserve.
*set more off.
*stset slp_139, failure (progres1=1).
*stsum, by(lkb1).
*stci, by(lkb1).
*stcox i.lkb1.
*sts test lkb1.
*sts graph, by(lkb1) risktable censored(single).
*restore.
```

```
* 18 Previous treatment.

*preserve.

*set more off.

*stset slp_139, failure (progres1==1).

*stsum, by(tto_previo).

*stci, by(tto_previo).

*stcox i.tto_previo.

*sts test tto_previo.

*sts graph, by(tto_previo) risktable censored(single).

*restore.

* 19 2nd Line.

*preserve.

*set more off.

*stset slp_139, failure (progres1=1).

*stsum, by(segunda_linea).

*stci, by(segunda_linea).

*stcox i.segunda_linea.

*sts test segunda_linea.

*sts graph, by(segunda_linea) risktable censored(single).

*restore.

* 20 3rd Line.

*preserve.

*set more off.

*stset slp_139, failure (progres1=1).

*stsum, by(tercera_linea).

*stci, by(tercera_linea).

*stcox i.tercera_linea.

*sts test tercera_linea.

*sts graph, by(tercera_linea) risktable censored(single).

*restore.
```

.

\*preserve.

\*set more off.

\*stset slp\_139, failure (progres1==1).

\*sw, pe (0.10)lockterm1:stcox intervention gender age ///, >

\*smk wse adeno\_gp bone\_mets pleural\_mets cl\_mets ///, >

\*adrenal\_mets brain\_mets liver\_mets mut ///, >

\*EGFR\_TKI orr dcr segunda\_linea tercera\_linea.

\*estat phtest.

\*estat ic.

\*restore.

\*preserve.

\*set more off.

\*stset slp\_139, failure (progres1==1).

\*sw, pe (0.05)lockterm1:stcox intervention gender age ///, >

\*smk wse adeno\_gp bone\_mets pleural\_mets cl\_mets ///, >

\*adrenal\_mets brain\_mets liver\_mets mut ///, >

\*EGFR\_TKI orr dcr segunda\_linea tercera\_linea.

\*estat phtest.

\*estat ic.

\*restore.

\*preserve.

\*set more off.

\*stset slp\_139, failure (progres1==1).

\*sw, pe (0.05):stcox intervention gender age ///, >

\*smk wse adeno\_gp bone\_mets pleural\_mets cl\_mets ///, >

\*adrenal\_mets brain\_mets liver\_mets mut ///, >

\*EGFR\_TKI orr dcr segunda\_linea tercera\_linea.

\*estat phtest.

\*estat ic.

```
*restore.  
  
* Note: LKB1 was excluded a priori from multivariable model.  
  
* due to the low frequency of available data (n=24).  
  
. .  
  
*0 Overall.  
  
*preserve.  
  
*set more off.  
  
*stset sg_139, failure (status=1).  
  
*stsum.  
  
*stci.  
  
*sts graph, risktable censored(single).  
  
*restore.  
  
* 1 Sex.  
  
*preserve.  
  
*set more off.  
  
*stset sg_139, failure (status=1).  
  
*stsum, by(gender).  
  
*stci, by(gender).  
  
*stcox i.gender.  
  
*sts test gender.  
  
*sts graph, by(gender) risktable censored(single).  
  
*restore.  
  
* 2 Age.  
  
*preserve.  
  
*set more off.  
  
*stset sg_139, failure (status=1).  
  
*stsum, by(age_groups).  
  
*stci, by(age_groups).  
  
*stcox c.age.  
  
*streg age, dist(exponential) tr.
```

\*sts test age.  
\*sts graph, by(age\_groups) risktable censored(single).  
\*restore.  
\* 3 Smoking status.  
\*preserve.  
\*set more off.  
\*stset sg\_139, failure (status=1).  
\*stsum, by(sm).  
\*stci, by(sm).  
\*stcox i.sm.  
\*sts test sm.  
\*sts graph, by(sm) risktable censored(single).  
\*restore.  
\* 4 Wood---smoke exposure.  
\*preserve.  
\*set more off.  
\*stset sg\_139, failure (status=1).  
\*stsum, by(wse).  
\*stci, by(wse).  
\*stcox i.wse.  
\*sts test wse.  
\*sts graph, by(wse) risktable censored(single).  
\*restore.  
\* 5 Adenocarcinoma Subtype.  
\*preserve.  
\*set more off.  
\*stset sg\_139, failure (status=1).  
\*stsum, by(adenogp).  
\*stci, by(adenogp).  
\*stcox i.adenogp.

```
*sts test adeno_gp.  
*sts graph, by(adeno_gp) risktable censored(single).  
*restore.  
* 6 Bone metastases.  
*preserve.  
*set more off.  
*stset sg_139, failure (status=1).  
*stsum, by(bone_mets).  
*stci, by(bone_mets).  
*stcox i.bone_mets.  
*sts test bone_mets.  
*sts graph, by(bone_mets) risktable censored(single).  
*restore.  
* 7 Pleural metastases.  
*preserve.  
*set more off.  
*stset sg_139, failure (status=1).  
*stsum, by(pleural_mets).  
*stci, by(pleural_mets).  
*stcox i.pleural_mets.  
*sts test pleural_mets.  
*sts graph, by(pleural_mets) risktable censored(single).  
*restore.  
* 8 Contralateral metastases.  
*preserve.  
*set more off.  
*stset sg_139, failure (status=1).  
*stsum, by(cl_mets).  
*stci,by(cl_mets).  
*stcox i.cl_mets.
```

```
*sts test cl_mets.  
  
*sts graph, by(cl_mets) risktable censored(single).  
  
*restore.  
  
* 9 Adrenal metastases.  
  
*preserve.  
  
*set more off.  
  
*stset sg_139, failure (status=1).  
  
*stsum, by(adrenal_mets).  
  
*stci, by(adrenal_mets).  
  
*stcox i.adrenal_mets.  
  
*sts test adrenal_mets.  
  
*sts graph, by(adrenal_mets) risktable censored(single).  
  
*restore.  
  
* 10 Brain metastases.  
  
*preserve.  
  
*set more off.  
  
*stset sg_139, failure (status=1).  
  
*stsum, by(brain_mets).  
  
*stci, by(brain_mets).  
  
*stcox i.brain_mets.  
  
*sts test brain_mets.  
  
*sts graph, by(brain_mets) risktable censored(single).  
  
*restore.  
  
* 11 Liver metastases.  
  
*preserve.  
  
*set more off.  
  
*stset sg_139, failure (status=1).  
  
*stsum, by(liver_mets).  
  
*stci, by(liver_mets).  
  
*stcox i.liver_mets.
```

\*sts test liver\_mets.  
\*sts graph, by(liver\_mets) risktable censored(single).  
\*restore.  
\* 12 Mutation status.  
\*preserve.  
\*set more off.  
\*stset sg\_139, failure (status=1).  
\*stsum, by(mut).  
\*stci, by(mut).  
\*stcox i.mut.  
\*sts test mut.  
\*sts graph, by(mut) risktable censored(single).  
\*restore.  
\* 13 EGFR TKIs.  
\*preserve.  
\*set more off.  
\*stset sg\_139, failure (status=1).  
\*stsum, by(EGFR\_TKI).  
\*stci, by(EGFR\_TKI).  
\*stcox ib3.EGFR\_TKI.  
\*sts test EGFR\_TKI.  
\*sts graph, by(EGFR\_TKI) risktable censored(single).  
\*restore.  
\* 14 Objective Response Rate (ORR).  
\*preserve.  
\*set more off.  
\*stset sg\_139, failure (status=1).  
\*stsum, by(orr).  
\*stci, by(orr).  
\*stcox i.orr.



\*sts test orr.  
\*sts graph, by(orr) risktable censored(single).  
\*restore.  
\* 15 Disease control rate (DCR).  
\*preserve.  
\*set more off.  
\*stset sg\_139, failure (status=1).  
\*stsum, by(dcr).  
\*stci, by(dcr).  
\*stcox i.dcr.  
\*sts test dcr.  
\*sts graph, by(dcr) risktable censored(single).  
\*restore.  
\* 16 Intervention (Therapeutic arm).  
\*preserve.  
\*set more off.  
\*stset sg\_139, failure (status=1).  
\*stsum, by(intervention).  
\*stci, by(intervention).  
\*stcox i.intervention.  
\*sts test intervention.  
\*sts graph, by(intervention) risktable censored(single).  
\*restore.  
\* 17 LKB---1.  
\*preserve.  
\*set more off.  
\*stset sg\_139, failure (status=1).  
\*stsum, by(lkb1).  
\*stci, by(lkb1).  
\*stcox i.lkb1.

```
*sts test lkb1.

*sts graph, by(lkb1) risktable censored(single).

*restore.

* 18 Previous treatment.

*preserve.

*set more off.

*stset sg_139, failure (status=1).

*stsum, by(tto_previo).

*stci, by(tto_previo).

*stcox i.tto_previo.

*sts test tto_previo.

*sts graph, by(tto_previo) risktable censored(single).

*restore.

* 19 2nd Line.

*preserve.

*set more off.

*stset sg_139, failure (status=1).

*stsum, by(segunda_linea).

*stci, by(segunda_linea).

*stcox i(segunda_linea).

*sts test segunda_linea.

*sts graph, by(segunda_linea) risktable censored(single).

*restore.

* 20 3rd Line.

*preserve.

*set more off.

*stset sg_139, failure (status=1).

*stsum, by(tercera_linea).

*stci, by(tercera_linea).

*stcox i.tercera_linea.
```

```
*sts test tercera_linea.  
  
*sts graph, by(tercera_linea) risktable censored(single).  
  
*restore.  
  
*preserve.  
  
*set more off.  
  
*stset sg_139, failure (status=1).  
  
*sw, pe (0.10):stcox intervention gender age ///, >  
  
*smk wse adeno_gp bone_mets pleural_mets cl_mets ///, >  
  
*adrenal_mets brain_mets liver_mets mut ///, >  
  
*EGFR_TKI orr dcr segunda_linea tercera_linea.  
  
*estat phtest.  
  
*estat ic.  
  
*restore.  
  
*preserve.  
  
*set more off.  
  
*stset sg_139, failure (status=1).  
  
*sw, pe (0.05)lockterm1:stcox intervention gender age ///, >  
  
*smk wse adeno_gp bone_mets pleural_mets cl_mets ///, >  
  
*adrenal_mets brain_mets liver_mets mut ///, >  
  
*EGFR_TKI orr dcr segunda_linea tercera_linea.  
  
*estat phtest.  
  
*estat ic.  
  
*restore.  
  
*preserve.  
  
*set more off.  
  
*stset sg_139, failure (status=1).  
  
*sw, pe (0.05):stcox intervention gender age ///, >  
  
*smk wse adeno_gp bone_mets pleural_mets cl_mets ///, >  
  
*adrenal_mets brain_mets liver_mets mut ///, >  
  
*EGFR_TKI orr dcr segunda_linea tercera_linea.
```

\*estat phtest.

\*estat ic.

\*restore.

\* Note: LKB1 was excluded a priori from multivariable model.

\* due to the low frequency of available data (n=24).

.\*

\*END.

clear.

log close name: <unnamed>

log: /Users/alejandra/Desktop/jama.log

log type: text

closed on: 6 May 2019, 12:21:57

-----  
-----

**eTable 1.** Concordance agreement assessment among radiooncologists (n=2) for the radiographic evaluation of the best response rate through RECIST v1.1

| Radiologist 1    | Radiologist 2       |                    |                  |                |                     |        |
|------------------|---------------------|--------------------|------------------|----------------|---------------------|--------|
|                  | Best response rate  | Complete response  | Partial Response | Stable disease | Disease progression | Total  |
|                  | Complete response   | 11                 | 0                | 0              | 0                   | 11     |
|                  | Partial Response    | 2                  | 69               | 5              | 0                   | 76     |
|                  | Stable disease      | 0                  | 6                | 38             | 2                   | 46     |
|                  | Disease progression | 0                  | 1                | 0              | 5                   | 6      |
|                  | Total               | 13                 | 76               | 43             | 7                   | 139    |
| Agreement scores |                     |                    |                  |                |                     |        |
| Agreement        |                     | Expected agreement | Kappa            | Std. Err       | Z                   | Prob>Z |
| 88.49%           |                     | 41.09%             | 0.8046           | 0.0621         | 12.96               | 0      |

| Radiologist 1    | Radiologist 2  |                    |                |            |     |        |
|------------------|----------------|--------------------|----------------|------------|-----|--------|
|                  |                | Responders         | Not responders | Total      |     |        |
|                  | Responders     | 82                 | 5              | 87         |     |        |
|                  | Not responders | 7                  | 45             | 52         |     |        |
|                  | Total          | 89                 | 50             | 139        |     |        |
| Agreement scores |                |                    |                |            |     |        |
| Agreement        |                | Expected agreement | Kappa          | Std. error | Z   | Prob>Z |
| 91.37%           |                | 53.53%             | 0.8142         | 0.0848     | 9.6 | 0      |

**eTable 2.** Univariate and multivariate analysis of the clinic-pathological factors associated with progression-free survival according to Radiooncologist 2

|                                         | Overall | Number of events | Median months (95% CI) | p-Value | HR (95% CI)        | p-value |
|-----------------------------------------|---------|------------------|------------------------|---------|--------------------|---------|
| Global                                  | 139     | 92               | 10.0 (5.8 – 15.5)      |         |                    |         |
| <b>Gender</b>                           |         |                  |                        |         |                    |         |
| Female                                  | 91      | 63               | 9.9 (5.5 – 15.5)       |         |                    |         |
| Male                                    | 48      | 29               | 10.3 (6.8 – 14.3)      | 0.7789  |                    |         |
| <b>Age</b>                              |         |                  |                        |         |                    |         |
| <60                                     | 76      | 53               | 10.1 (6.8 – 17.5)      |         |                    |         |
| ≥60                                     | 63      | 29               | 10.9 (5.5 – 14.3)      | 0.4562  |                    |         |
| <b>Tobacco exposure</b>                 |         |                  |                        |         |                    |         |
| Absent                                  | 101     | 65               | 10.1 (5.8 – 15.5)      |         |                    |         |
| Present                                 | 38      | 27               | 10.3 (6.9 – 17.5)      | 0.8061  |                    |         |
| <b>Wood-smoke exposure</b>              |         |                  |                        |         |                    |         |
| Absent                                  | 87      | 57               | 10.1 (6.5 – 16.9)      |         |                    |         |
| Present                                 | 52      | 35               | 10.4 (5.4 – 14.2)      | 0.7972  |                    |         |
| <b>Predominant histological pattern</b> |         |                  |                        |         |                    |         |
| Well/Moderately differentiated          | 56      | 42               | 11.2 (6.8 – 18.6)      |         |                    |         |
| Poorly/Non differentiated               | 83      | 50               | 9.8 (5.8 – 14.0)       | 0.1538  | 1.21 (0.77 - 1.89) | 0.4     |
| <b>Metastases</b>                       |         |                  |                        |         |                    |         |
| <b>Bone</b>                             |         |                  |                        |         |                    |         |
| Absent                                  | 82      | 54               | 10.4 (5.5 – 16.9)      |         |                    |         |
| Present                                 | 57      | 38               | 9.9 (6.8 – 14.0)       | 0.3849  |                    |         |
| <b>Pleura</b>                           |         |                  |                        |         |                    |         |
| Absent                                  | 92      | 57               | 10.4 (5.5 – 16.9)      |         |                    |         |

|                                            | Overall (continued) | Number of events | Median months (95% CI) | p-Value       | HR (95% CI)        | p-value      |
|--------------------------------------------|---------------------|------------------|------------------------|---------------|--------------------|--------------|
| Present                                    | 47                  | 35               | 10.1 (6.9 – 14.2)      | 0.7434        |                    |              |
| <b>Contralateral lung</b>                  |                     |                  |                        |               |                    |              |
| Absent                                     | 92                  | 59               | 10.1 (6.5 – 16.7)      |               |                    |              |
| Present                                    | 47                  | 33               | 10.3 (5.8 – 14.3)      | 0.9507        |                    |              |
| <b>Adrenal glands</b>                      |                     |                  |                        |               |                    |              |
| Absent                                     | 130                 | 87               | 10.1 (5.8 – 15.5)      |               |                    |              |
| Present                                    | 9                   | 5                | 11.2 (9.9 – 13.5)      | 0.8108        |                    |              |
| <b>Central Nervous System</b>              |                     |                  |                        |               |                    |              |
| Absent                                     | 86                  | 52               | 11.8 (6.8 – 16.9)      |               |                    |              |
| Present                                    | 53                  | 40               | 9.5 (5.2 – 13.2)       | 0.0778        | 1.55 (1.01 - 2.38) | <b>0.043</b> |
| <b>Liver</b>                               |                     |                  |                        |               |                    |              |
| Absent                                     | 130                 | 84               | 10.4 (6.9 – 16.7)      |               |                    |              |
| Present                                    | 9                   | 8                | 5.8 (4.7 – 7.3)        | 0.0116        | 2.83 (1.28 - 6.27) | <b>0.010</b> |
| <b>EGFR mutational profile</b>             |                     |                  |                        |               |                    |              |
| Exon 18 (G719X)                            | 5                   | 5                | 9.9 (7.2 – 24.9)       |               |                    |              |
| Exon 19 (Deletion)                         | 89                  | 56               | 10.1 (5.8 – 16.7)      | 0.6075        |                    |              |
| Exon 21 (L858R)                            | 45                  | 33               | 10.3 (5.8 – 13.7)      |               |                    |              |
| <b>EGFR-TKIs treatment characteristics</b> |                     |                  |                        |               |                    |              |
| Gefitinib                                  | 50                  | 31               | 9.8 (5.8 – 17.1)       |               |                    |              |
| Afatinib                                   | 63                  | 40               | 11.2 (5.3 – 15.2)      | 0.8064        |                    |              |
| Erlotinib                                  | 26                  | 21               | 10.1 (6.83 – 18.6)     |               |                    |              |
| <b>Overall response rate</b>               |                     |                  |                        |               |                    |              |
| Present                                    | 89                  | 59               | 13.1 (7.4 – 17.5)      |               |                    |              |
| Absent                                     | 50                  | 33               | 9.0 (4.7 – 10.9)       | <b>0.0011</b> |                    |              |
| <b>Disease control rate</b>                |                     |                  |                        |               |                    |              |

|                          | Overall<br>(continued) | Number of events | Median months<br>(95% CI) | p-Value           | HR (95% CI)         | p-value      |
|--------------------------|------------------------|------------------|---------------------------|-------------------|---------------------|--------------|
| Present                  | 132                    | 85               | 10.9 (6.9 – 16.7)         |                   |                     |              |
| Absent                   | 7                      | 7                | 2.8 (1.8 – 5.2)           | <b>&lt;0.0001</b> | 4.54 (1.70 - 12.11) | <b>0.003</b> |
| <b>Therapeutic arm</b>   |                        |                  |                           |                   |                     |              |
| EGFR-TKIs                | 70                     | 50               | 9.7 (5.1 – 14.3)          |                   |                     |              |
| EGFR-TKIs +<br>metformin | 69                     | 42               | 11.8 (7.3 – 20.6)         | <b>0.0391</b>     | 0.64 (0.41 - 0.99)  | <b>0.049</b> |
| <b>LKB1 expression</b>   |                        |                  |                           |                   |                     |              |
| Negative                 | 8                      | 8                | 25.7 (13.2 - 38.1)        |                   |                     |              |
| Positive                 | 16                     | 11               | 20.5 (NR)                 | 0.054             |                     |              |
| <b>Second line</b>       |                        |                  |                           |                   |                     |              |
| Absent                   | 78                     | 43               | 11.8 (5.8 – 19.1)         |                   |                     |              |
| Present                  | 61                     | 49               | 9.7 (6.8 – 14.3)          | <b>0.1817</b>     |                     |              |
| <b>Third line</b>        |                        |                  |                           |                   |                     |              |
| Present                  | 114                    | 71               | 10.9 (5.8 – 16.9)         |                   |                     |              |
| Absent                   | 17                     | 17               | 9.8 (7.3 – 13.2)          | 0.1629            |                     |              |



**eTable 3.** Crude and adjusted Hazard Ratios for PFS by Radio-oncologists 1 and 2.

| Variables and Comparisons |                               | Radio-oncologist 1 |              |                  |              | Radio-oncologist 2 |              |                    |              |
|---------------------------|-------------------------------|--------------------|--------------|------------------|--------------|--------------------|--------------|--------------------|--------------|
|                           |                               | Crude              |              | Adjusted         |              | Crude              |              | Adjusted           |              |
| Variable                  | Comparison                    | HR (95% CI)        | p-Value      | HR (95% CI)      | p-Value      | HR (95% CI)        | p-Value      | HR (95% CI)        | p-Value      |
| Sex                       | M vs. F                       | 0.97 (0.62 - 1.54) | 0.918        |                  |              | 0.93 (0.60 - 1.46) | 0.779        |                    |              |
| Age                       | For each year                 | 1.00 (0.99 - 1.02) | 0.302        |                  |              | 0.99 (0.98 - 1.01) | 0.847        |                    |              |
| Smoke                     | Ever vs. Never                | 0.86 (0.53 - 1.39) | 0.554        |                  |              | 0.94 (0.60 - 1.48) | 0.806        |                    |              |
| WSE                       | Present vs. Absent            | 1.13 (0.73 - 1.75) | 0.586        |                  |              | 1.05 (0.69 - 1.62) | 0.797        |                    |              |
| Adenocarcinoma subtype    | Poor vs. Well/Moderate        | 1.39 (0.89 - 2.17) | 0.144        | 0.82 (0.5 - 1.3) | 0.423        | 1.36 (0.88 - 2.09) | 0.155        | 1.21 (0.77 - 1.89) | 0.4          |
| Bone metastases           | Present vs. Absent            | 1.13 (0.73 - 1.75) | 0.592        |                  |              | 1.20 (0.79 - 1.83) | 0.386        |                    |              |
| Pleural metastases        | Present vs. Absent            | 1.12 (0.72 - 1.74) | 0.602        |                  |              | 1.07 (0.70 - 1.63) | 0.744        |                    |              |
| Contralateral             | Present vs. Absent            | 1.05 (0.67 - 1.64) | 0.827        |                  |              | 1.01 (0.65 - 1.56) | 0.951        |                    |              |
| Adrenal                   | Present vs. Absent            | 0.94 (0.38 - 2.33) | 0.898        |                  |              | 0.89 (0.36 - 2.21) | 0.811        |                    |              |
| Brain                     | Present vs. Absent            | 1.43 (0.93 - 2.21) | 0.105        | 1.54 (0.9 - 2.4) | 0.058        | 1.45 (0.95 - 2.21) | 0.080        | 1.55 (1.01 - 2.38) | <b>0.043</b> |
| Liver                     | Present vs. Absent            | 2.29 (1.04 - 5.05) | <b>0.039</b> | 2.71 (1.2 - 6.3) | <b>0.021</b> | 2.52 (1.19 - 5.29) | 0.015        | 2.83 (1.28 - 6.27) | <b>0.010</b> |
| EGFR mutation status      | E18(G719X)                    | 1.00 (Reference)   | ...          |                  |              | 1.00 (Reference)   | ...          |                    |              |
|                           | E 19 (del)                    | 2.31 (0.56 - 9.55) | 0.244        |                  |              | 1.77 (0.55 - 5.71) | 0.333        |                    |              |
|                           | E 21 (L858R)                  | 2.30 (0.54 - 9.67) | 0.254        |                  |              | 1.65 (0.50 - 5.43) | 0.408        |                    |              |
| EGFR TKI                  | Gefitinib                     | 1.00 (Reference)   | ...          |                  |              | 1.00 (Reference)   | ...          |                    |              |
|                           | Afatinib                      | 0.98 (0.59 - 1.62) | 0.941        |                  |              | 1.10 (0.68 - 1.78) | 0.683        |                    |              |
|                           | Erlotinib                     | 1.05 (0.59 - 1.83) | 0.866        |                  |              | 0.92 (0.53 - 1.62) | 0.799        |                    |              |
| ORR                       | Not responders vs. Responders | 1.92 (1.20 - 3.05) | 0.006        |                  |              | 2.08 (1.32 - 3.25) | <b>0.001</b> |                    |              |

|              |                                      |                     |                  |                   |              |                     |                  |                     |              |
|--------------|--------------------------------------|---------------------|------------------|-------------------|--------------|---------------------|------------------|---------------------|--------------|
| DCR          | Uncontrolled vs. Controlled diseases | 5.85 (2.25 - 15.3)  | <b>&lt;0.001</b> | 4.81 (0.8 - 12.9) | <b>0.002</b> | 7.96 (3.44 - 18.40) | <b>&lt;0.001</b> | 4.54 (1.70 - 12.11) | <b>0.003</b> |
| Intervention | M+TKI vs. TKI alone                  | 0.59 (0.38 - 0.92)  | <b>0.019</b>     | 0.60 (0.4 - 0.94) | <b>0.028</b> | 0.64 (0.42 - 0.98)  | 0.041            | 0.64 (0.41 - 0.99)  | <b>0.049</b> |
| LKB1         | Positive vs. Negative                | 0.43 (0.16 - 1.16)  | 0.096            |                   |              | 0.38 (0.14 - 1.05)  | 0.064            |                     |              |
| Second line  | Present vs. Absent                   | 1.45 (0.95 - 2.24)  | 0.090            |                   |              | 1.32 (0.87 - 2.00)  | 0.182            |                     |              |
| Third line   | Present vs. Absent                   | 1.41 ( 0.81 - 2.45) | 0.218            |                   |              | 1.46 (0.85 - 2.50)  | 0.165            |                     |              |

**eTable 4.** Adverse events

| Adverse event | EGFR-TKI        |             |            | EGFR-TKIs + Metformin |             |            | p-Value for comparisons |               |
|---------------|-----------------|-------------|------------|-----------------------|-------------|------------|-------------------------|---------------|
|               | Any grade n (%) | G 1/2 n (%) | G ≥3 n (%) | Any grade n (%)       | G 1/2 n (%) | G ≥3 n (%) | Absent vs. Present      | G1/2 vs. G ≥3 |
| Diarrhea      | 59 (84.3)       | 55 (93.2)   | 4 (6.8)    | 54 (78.3)             | 48 (88.9)   | 11.1 (6)   | 0.362                   | 0.418         |
| Rash          | 47 (67.1)       | 44 (93.6)   | 3 (6.4)    | 48 (69.6)             | 47 (97.9)   | 2.1 (1)    | 0.759                   | 0.362         |
| Nausea        | 31 (44.3)       | 30 (96.8)   | 1 (3.2)    | 31 (44.9)             | 30 (96.8)   | 1 (3.2)    | 0.939                   | 1.000         |
| Mucositis     | 28 (40.0)       | 27 (96.4)   | 1 (3.6)    | 26 (37.7)             | 100.0 (26)  | 0 (0)      | 0.779                   | 1.000         |
| Paronychia    | 21 (30.0)       | 100.0 (21)  | 0 (0)      | 21 (30.4)             | 100.0 (21)  | 0 (0)      | 0.955                   | 1.000         |
| Asthenia      | 24 (34.3)       | 23 (95.8)   | 4.2 (1)    | 19 (27.5)             | 100.0 (19)  | 0 (0)      | 0.389                   | 1.000         |
| Xerostomia    | 19 (27.1)       | 100.0 (19)  | 0 (0)      | 15 (21.7)             | 100.0 (15)  | 0 (0)      | 0.459                   | NA            |
| Vomit         | 12 (17.1)       | 10 (83.3)   | 2 (16.7)   | 16 (23.2)             | 100.0 (16)  | 0 (0)      | 0.374                   | 0.175         |
| Xerophthalmia | 11 (15.7)       | 100.0 (11)  | 0 (0)      | 7 (10.1)              | 100.0 (7)   | 0 (0)      | 0.328                   | NA            |
| Anorexia      | 14 (20.0)       | 100.0 (14)  | 0 (0)      | 12 (17.4)             | 100.0 (12)  | 0 (0)      | 0.693                   | NA            |
| Constipation  | 8 (11.4)        | 100.0 (8)   | 0 (0)      | 9 (13.0)              | 100.0 (9)   | 0 (0)      | 0.771                   | NA            |
| Neuropathy    | 7 (10.0)        | 100.0 (7)   | 0 (0)      | 9 (13.0)              | 100.0 (9)   | 0 (0)      | 0.574                   | NA            |

**eTable 5.** Details of metformin treatment

| <b>Details of metformin treatment</b>     | <b>n=69</b> |
|-------------------------------------------|-------------|
|                                           | n (%)       |
| Metformin dose reduction                  | 24(34.8)    |
| Definitive metformin discontinuation      | 16(23.2)    |
| Continue with metformin after progression | 33(47.8)    |

**eTable 6.** Further lines of treatment

| <b>Treatment</b>               | <b>TKI % (n)<br/>(n=70)</b> | <b>TKI + M % (n)<br/>n=69</b> | <b>p-Value</b> |
|--------------------------------|-----------------------------|-------------------------------|----------------|
| <b>Second line</b>             |                             |                               |                |
| Absent                         | 55.7 (39)                   | 56.5 (39)                     |                |
| Present                        | 44.3 (31)                   | 43.5 (30)                     | 0.924          |
| <b>Second line regimen</b>     |                             |                               |                |
| Carboplatin + Pemetrexed       | 80.6 (25)                   | 60.0 (18)                     |                |
| Carboplatin + Paclitaxel       | 19.4 (6)                    | 40.0 (12)                     | 0.077          |
| <b>Progression to 2nd line</b> |                             |                               |                |
| No                             | 25.8 (8)                    | 33.3 (10)                     |                |
| Yes                            | 74.2 (23)                   | 66.7 (20)                     | 0.653          |
| <b>Third line</b>              |                             |                               |                |
| Absent                         | 85.7 (60)                   | 89.9 (62)                     |                |
| Present                        | 14.3 (10)                   | 10.1 (7)                      | 0.309          |
| <b>Third line regimen</b>      |                             |                               |                |
| <b>Treatment (continued)</b>   | <b>TKI % (n)<br/>(n=70)</b> | <b>TKI + M % (n)<br/>n=69</b> | <b>p-Value</b> |
| Docetaxel                      | 50.0 (5)                    | 28.6 (2)                      |                |
| Docetaxel + Pembrolizumab      | 30.0 (3)                    | 14.3 (1)                      |                |
| Pemetrexed                     | 10.0 (1)                    | 28.6 (2)                      |                |
| Nivolumab                      | 10.0 (1)                    | 14.3 (1)                      |                |
| Gemcitabine                    | 0.0 (0)                     | 14.3 (1)                      | 0.527          |
| <b>Progression to 3rd line</b> |                             |                               |                |
| No                             | 0.0 (0)                     | 28.6 (2)                      |                |
| Yes                            | 100.0 (10)                  | 71.4 (5)                      | 0.086          |

**eTable 7.** Overall survival among patients who did not receive a second-line of therapy after intervention

| Variable               | Comparison                  | Crude              |         | Adjusted    |         |
|------------------------|-----------------------------|--------------------|---------|-------------|---------|
|                        |                             | HR (95% CI)        | p-Value | HR (95% CI) | p-Value |
| Sex                    | M vs. F                     | 0.79 (0.37 - 1.68) | 0.547   |             |         |
| Age                    | For each year               | 1.00 (0.97 - 1.03) | 0.640   |             |         |
| Smoke                  | Ever vs. Never              | 0.61 (0.23 - 1.57) | 0.303   |             |         |
| WSE                    | Present vs. Absent          | 1.13 (0.55 - 2.27) | 0.739   |             |         |
| Adenocarcinoma subtype | Poor vs. Well/Moderate      | 1.36 (0.65 - 2.82) | 0.405   |             |         |
| Bone metastases        | Present vs. Absent          | 1.07 (0.52 - 2.21) | 0.837   |             |         |
| Pleural metastases     | Present vs. Absent          | 0.73 (0.35 - 1.55) | 0.424   |             |         |
| Contralateral          | Present vs. Absent          | 0.51 (0.23 - 1.13) | 0.097   |             |         |
| Adrenal                | Present vs. Absent          | 1.34 (0.32 - 5.64) | 0.694   |             |         |
| Brain                  | Present vs. Absent          | 1.42 (0.70 - 2.87) | 0.332   |             |         |
| Liver                  | Present vs. Absent          | 2.53 (0.74 - 8.75) | 0.140   |             |         |
| EGFR mutation status   | E18(G719X)                  | NA*                | ...     |             |         |
|                        | E 21 (L858R) vs. E 19 (Del) | 0.79 (0.38 - 1.62) | 0.522   |             |         |
| EGFR TKI               | Gefitinib                   | 1.00 (Reference)   | ...     |             |         |
|                        | Afatinib                    | 0.72 (0.33 - 1.59) | 0.425   |             |         |
|                        | Erlotinib                   | 0.62 (0.25 - 1.55) | 0.313   |             |         |
|                        |                             |                    |         |             |         |

| Variable<br>(continued)                                            | Comparison                           | Crude                |                  | Adjusted              |                  |
|--------------------------------------------------------------------|--------------------------------------|----------------------|------------------|-----------------------|------------------|
|                                                                    |                                      | HR (95% CI)          | p-Value          | HR (95% CI)           | p-Value          |
| DCR                                                                | Uncontrolled vs. Controlled diseases | 21.4 (3.85 - 118.47) | <b>&lt;0.001</b> | 26.13 (4.47 - 152.58) | <b>&lt;0.001</b> |
| Intervention                                                       | M+TKI vs. TKI alone                  | 0.33 (0.15 - 0.73)   | <b>0.006</b>     | 0.32 (0.14 - 0.70)    | <b>0.005</b>     |
| LKB1                                                               | Positive vs. Negative                | 0.33 (0.03 - 3.20)   | 0.340            |                       |                  |
| * NA: Not available; there were any event (death) among this group |                                      |                      |                  |                       |                  |

**eTable 8.** Overall survival among patients who received a second-line of therapy after intervention.

| Variable               | Comparison                    | Crude               |              | Adjusted            |              |
|------------------------|-------------------------------|---------------------|--------------|---------------------|--------------|
|                        |                               | HR (95% CI)         | p-Value      | HR (95% CI)         | p-Value      |
| Sex                    | M vs. F                       | 0.63 (0.22 - 1.79)  | 0.379        |                     |              |
| Age                    | For each year                 | 0.99 (0.95 - 1.03)  | 0.754        |                     |              |
| Smoke                  | Ever vs. Never                | 0.82 (0.31 - 2.28)  | 0.737        |                     |              |
| WSE                    | Present vs. Absent            | 0.92 (0.34 - 2.45)  | 0.868        |                     |              |
| Adenocarcinoma subtype | Poor vs. Well/Moderate        | 1.32 (0.52 - 3.39)  | 0.561        |                     |              |
| Bone metastases        | Present vs. Absent            | 0.63 (0.24 - 1.69)  | 0.360        |                     |              |
| Pleural metastases     | Present vs. Absent            | 1.39 (0.52 - 3.71)  | 0.501        |                     |              |
| Contralateral          | Present vs. Absent            | 1.99 (0.76 - 5.21)  | 0.160        |                     |              |
| Adrenal                | Present vs. Absent            | 1.42 (0.18 - 11.23) | 0.738        |                     |              |
| Brain                  | Present vs. Absent            | 1.23 (0.46 - 3.30)  | 0.675        |                     |              |
| Liver                  | Present vs. Absent            | 1.12 (0.25 - 5.00)  | 0.883        |                     |              |
| EGFR mutation status   | E18(G719X)                    | NA                  |              |                     |              |
|                        | E 21 (L858R) vs. E 19 (Del)   | 0.91 (0.32 - 2.57)  | 0.863        |                     |              |
| EGFR TKI               | Gefitinib                     | 1.00 (Reference)    |              |                     |              |
|                        | Afatinib                      | 0.71 (0.25 - 2.01)  | 0.525        |                     |              |
|                        | Erlotinib                     | 0.39 (0.09 - 1.54)  | 0.180        |                     |              |
| ORR                    | Not responders vs. Responders | 3.86 (1.41 - 10.50) | <b>0.008</b> | 3.25 (0.78 - 13.57) | <b>0.104</b> |



| Variable (continued)                                               | Comparison                           | Crude               |         | Adjusted           |         |
|--------------------------------------------------------------------|--------------------------------------|---------------------|---------|--------------------|---------|
|                                                                    |                                      | HR (95% CI)         | p-Value | HR (95% CI)        | p-Value |
| DCR                                                                | Uncontrolled vs. Controlled diseases | 2.79 (0.76 - 10.05) | 0.116   |                    |         |
| Intervention                                                       | M+TKI vs. TKI alone                  | 1.02 (0.39 - 2.61)  | 0.967   | 1.31 (0.46 - 3.75) | 0.605   |
| LKB1                                                               | Positive vs. Negative                | 0.58 (0.05 - 5.80)  | 0.647   |                    |         |
| * NA: Not available; there were any event (death) among this group |                                      |                     |         |                    |         |

**eTable 9.** Univariate and LKB1-stratified analysis of the clinic-pathological factors associated with progression-free survival

| Variable                         | LKB1 Negative |                        |         | LKB1 Positive |                        |         |
|----------------------------------|---------------|------------------------|---------|---------------|------------------------|---------|
|                                  | Number events | Median months (95% CI) | p-Value | Number events | Median months (95% CI) | p-Value |
| Gender                           |               |                        |         |               |                        |         |
| Female                           | 4 (4)         | 8.2 (0 - 18.8)         | 0.410   | 11 (8)        | 11.8 (9.3 - 14.3)      | 0.260   |
| Male                             | 4 (4)         | 10.3 (3.9 - 16.7)      |         | 5 (2)         | 27.9 (NR)              |         |
| Age                              |               |                        |         |               |                        |         |
| <60                              | 6 (6)         | 10.3 (6.4 - 14.2)      | 0.515   | 7 (3)         | 27.9 (8.9 - 47.0)      | 0.520   |
| ≥60                              | 2(2)          | 4.5 (NR)               |         | 9 (7)         | 13.1 (11.4 - 14.7)     |         |
| Tobacco exposure                 |               |                        |         |               |                        |         |
| Absent                           | 4 (4)         | 5.0 (1.3 - 8.7)        | 0.085   | 12 (8)        | 12.5 (8.9 - 16.1)      | 0.702   |
| Present                          | 4 (4)         | 11.5 (6.7 - 16.3)      |         | 4 (2)         | 13.1 (11.1 - 14.3)     |         |
| Absent                           | 5 (5)         | 14.3 (5.7 - 22.9)      | 0.073   | 6 (3)         | 27.9 (NR)              | 0.402   |
| Present                          | 3 (3)         | 5.0 (4.1 - 5.9)        |         | 10 (7)        | 13.1 (10.2 - 15.9)     |         |
| Predominant histological pattern |               |                        |         |               |                        |         |
| Well/Moderately differentiated   | 4 (4)         | 10.3 (3.4 - 17.2)      | 0.346   | 7 (5)         | 13.1 (11.9 - 14.3)     | 0.431   |
| Poorly/Non differentiated        | 4 (4)         | 8.2 (0.0 - 18.2)       |         | 9 (5)         | 11.8 (0.0 - 28.5)      |         |
| Metastases                       |               |                        |         |               |                        |         |
| Bone                             |               |                        |         |               |                        |         |
| Absent                           | 4 (4)         | 10.3 (0.7 - 19.9)      | 0.595   | 11 (5)        | 19.1 (11.2 - 26.9)     | 0.153   |
| Present                          | 4 (4)         | 8.2 (1.9 - 14.6)       |         | 5 (5)         | 10.9 (8.9 - 12.9)      |         |
| Pleura                           |               |                        |         |               |                        |         |
| Absent                           | 5 (5)         | 14.3 (0.0 - 34.3)      | 0.331   | 11 (6)        | 19.1 (9.6 - 28.6)      | 0.403   |
| Present                          | 3(3)          | 10.3 (7.0 - 13.6)      |         | 5 (4)         | 13.1 (8.4 - 17.7)      |         |
| Contralateral lung               |               |                        |         |               |                        |         |
| Absent                           | 5 (5)         | 11.5 (0.0 - 25.4)      | 0.554   | 9 (5)         | 19.1 (7.4 - 30.8)      | 0.469   |
| Present                          | 3 (3)         | 10.3 (7.0 - 13.6)      |         | 7 (5)         | 11.8 (9.9 - 13.8)      |         |
| Adrenal glands                   |               |                        |         |               |                        |         |
| Absent                           | 8 (8)         | 10.3 (5.0 - 14.3)      | N.E.    | 15 (10)       | 13.1 (10.9 - 27.9)     | N.E.    |
| Present                          | 0 (0)         | N.E.                   |         | 1 (0)         | N.E.                   |         |
| Central Nervous System           |               |                        |         |               |                        |         |
| Absent                           | 6 (6)         | 10.3 (6.4 - 14.2)      | N.R.    | 8 (2)         | NR (NR)                | 0.068   |
| Present                          | 2 (2)         | 4.5 (N.R.)             |         | 8 (8)         | 10.9 (6.6 - 15.2)      |         |

| Variable (continued)                | LKB1 Negative |                        |         | LKB1 Positive |                        |         |
|-------------------------------------|---------------|------------------------|---------|---------------|------------------------|---------|
|                                     | Number events | Median months (95% CI) | p-Value | Number events | Median months (95% CI) | p-Value |
| Liver                               |               |                        |         |               |                        |         |
| Absent                              | 8 (8)         | 10.3 (5.8 - 14.3)      | N.E.    | 16 (10)       | 13.1 (11.9 - 14.3)     | N.E.    |
| Present                             | 0 (0)         | N.E.                   |         | 0 (0)         | N.E.                   |         |
| EGFR mutational profile             |               |                        |         |               |                        |         |
| Exon 18 (G719X)                     | 0 (0)         | NE                     | 0.945   | 2 (1)         | 9.9 (NR)               | 0.989   |
| Exon 19 (Deletion)                  | 4 (4)         | 11.5 (2.4 - 20.6)      |         | 8 (5)         | 19.1 (9.9 - 28.2)      |         |
| Exon 21 (L858R)                     | 4 (4)         | 8.2 (2.5 - 13.9)       |         | 6 (4)         | 13.1 (10.4 - 15.7)     |         |
| EGFR-TKIs treatment characteristics |               |                        |         |               |                        |         |
| Gefitinib                           | 1 (1)         | 8.2 (NR)               | 0.528   | 5 (3)         | 13.2 (0.0 - 27.8)      | 0.369   |
| Afatinib                            | 5 (5)         | 11.5 (8.9 - 14.0)      |         | 5 (2)         | 10.9 (1.5 - 20.3)      |         |
| Erlotinib                           | 2 (2)         | 4.5 (NR)               |         | 6 (5)         | 11.8 (8.7 - 14.9)      |         |
| Disease control rate                |               |                        |         |               |                        |         |
| Present                             | 8 (8)         | 10.3 (5.8 - 14.3)      | N.E.    | 16 (10)       | 13.1 (11.9 - 14.3)     | N.E.    |
| Absent                              | 0 (0)         | N.E.                   |         | 0 (0)         | N.E.                   |         |
| Treatment arm                       |               |                        |         |               |                        |         |
| EGFR-TKIs                           | 3 (3)         | 11.5 (1.1 - 21.8)      | 0.500   | 6 (4)         | 12.5 (4.5 - 20.5)      | 0.319   |
| EGFR-TKIs + metformin               | 5 (5)         | 10.3 (5.8 - 14.7)      |         | 10 (6)        | 13.1 (0.0 - 28.4)      |         |

**eTable 10.** Univariate and LKB1-stratified analysis of the clinic-pathological factors associated with overall survival

| Variable              | LKB1 Negative    |                        |         | LKB1 Positive    |                        |              |
|-----------------------|------------------|------------------------|---------|------------------|------------------------|--------------|
|                       | Number of events | Median months (95% CI) | p-Value | Number of events | Median months (95% CI) | p-Value      |
| Gender                |                  |                        |         |                  |                        |              |
| Female                | 4 (2)            | 20.6 (4.6 - 36.5)      | 0.661   | 11 (5)           | 20.4 (17.1 - 23.7)     | 0.988        |
| Male                  | 4 (3)            | 25.6 (4.7 - 46.5)      |         | 5 (2)            | 29.1 (NR)              |              |
| Age                   |                  |                        |         |                  |                        |              |
| <60                   | 6 (3)            | 25.6 (0.0 - 57.7)      | 0.761   | 7 (3)            | NR (NR)                | 0.591        |
| ≥60                   | 2 (2)            | 20.6 (NR)              |         | 9 (4)            | 20.5 (NR)              |              |
| Arm treatment         |                  |                        |         |                  |                        |              |
| EGFR-TKIs             | 3 (1)            | NR (NR)                | 0.124   | 6 (5)            | 6.7 (0.0 - 17.7)       | <b>0.002</b> |
| EGFR-TKIs + metformin | 5 (4)            | 20.6 (4.5 - 36.6)      |         | 10 (2)           | NR (NR)                |              |
