# Supplementary material
Source: PubMed Central journal article supplement (PMC6735425)
Supplement: jamaoncol-5-e192553-s003.pdf [file jamaoncol-5-e192553-s003.pdf]

## Data Sharing Statement

Arrieta. Effect of Metformin Plus Tyrosine Kinase Inhibitors Compared With Tyrosine Kinase Inhibitors Alone in Patients With Epidermal Growth Factor Receptor-Mutated Lung Adenocarcinoma. *JAMA Oncol.* Published September 05, 2019. 10.1001/jamaoncol.2019.2553

### Data

**Data available:** Yes

**Data types:** Other (please specify)

**Additional Information:** Made available upon reasonable request to the authors

**How to access data:** [ogarrieta@gmail.com](mailto:ogarrieta@gmail.com)

**When available:** With publication

### Supporting Documents

**Document types:** Statistical/analytic code, Informed consent form

**How to access documents:** [ogarrieta@gmail.com](mailto:ogarrieta@gmail.com)

**When available:** With publication

### Additional Information

**Who can access the data:** Researchers whose proposed use of the data has been approved

**Types of analyses:** For a specified purpose

**Mechanisms of data availability:** After approval of a proposal
